# Supplementary material for: Molecular Mechanism of Tocotrienol-Mediated Anticancer Properties: A Systematic Review of the Involvement of Endoplasmic Reticulum Stress and Unfolded Protein Response
Source: MDPI journal article supplement (doi:10.3390/nu15081854), 2023-04-12
Supplement: s1 [file s1]

**Supplementary Table S2.** Search strategy of this systematic review

| Database | Search strategy                                                                                                                                                                                                                                   |
|----------|---------------------------------------------------------------------------------------------------------------------------------------------------------------------------------------------------------------------------------------------------|
| PubMed   | ((“vitamin E”) OR (tocotrienol) OR (tocopherol)) AND (("endoplasmic reticulum stress") OR (ERS) OR ("unfolded protein response") OR (UPR))                                                                                                        |
| WoS      | ((“vitamin E”) OR (tocotrienol) OR (tocopherol)) AND (("endoplasmic reticulum stress") OR (ERS) OR ("unfolded protein response") OR (UPR)); all field                                                                                             |
| Scopus   | TITLE-ABS-KEY((“vitamin E”) OR (tocotrienol) OR (tocopherol)) AND (("endoplasmic reticulum stress") OR (ERS) OR ("unfolded protein response") OR (UPR)); search title, abstract, keywords, article only, limited to English and research articles |
| EMBASE   | ((“vitamin E”) OR (tocotrienol) OR (tocopherol)) AND (("endoplasmic reticulum stress") OR (ERS) OR ("unfolded protein response") OR (UPR)); database from 1988 to week 7, 2023                                                                    |
